# Supplementary material for: Chemiluminescence sensing of aminothiols in biological fluids using peroxymonocarbonate-prepared networked gold nanoparticles
Source: Royal Society of Chemistry journal article supplement (doi:10.1039/c2an36510c), 2012-11-17
Supplement: c2an36510c.pdf [file c2an36510c.pdf]

## Supporting Information for:

Chemiluminescence sensing of aminothiols in biological fluids using  
peroxymonocarbonate-prepared networked gold nanoparticles

By Lijuan Zhang, Biqi Lu and Chao Lu\*

*State Key Laboratory of Chemical Resource Engineering, Beijing University of Chemical  
Technology, Beijing 100029, China. Fax/Tel: 86 010 64411957*

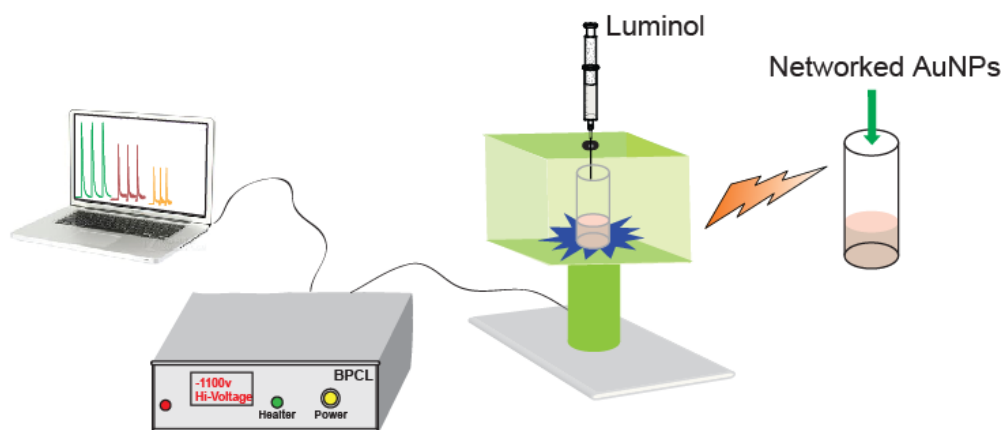

**Fig. S1** Schematic diagram of the static injection CL method. The injection volume of the as-prepared spherical AuNP solution or basic luminol solution was 100  $\mu$ L.

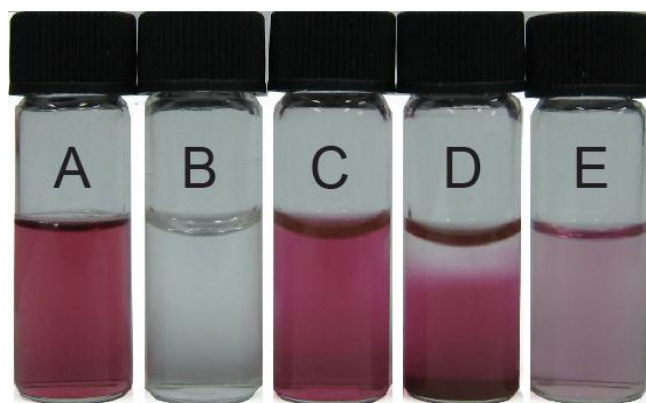

**Fig. S2** Pictures of the as-prepared AuNPs by the following solutions: (A),  $\text{HAuCl}_4\text{-H}_2\text{O}_2\text{-NaHCO}_3\text{-FSN}$  with 30 s reaction time at  $60^\circ\text{C}$ ; (B),  $\text{HAuCl}_4\text{-NaHCO}_3\text{-FSN}$  with 1 min reaction time at  $60^\circ\text{C}$ ; (C),  $\text{HAuCl}_4\text{-H}_2\text{O}_2\text{-NaHCO}_3$  with 1 min reaction time at  $60^\circ\text{C}$ ; (D), another 12 hours incubation of (C) at room temperature without stirring; (E),  $\text{HAuCl}_4\text{-H}_2\text{O}_2\text{-FSN}$  with 30 s reaction time at  $60^\circ\text{C}$ .

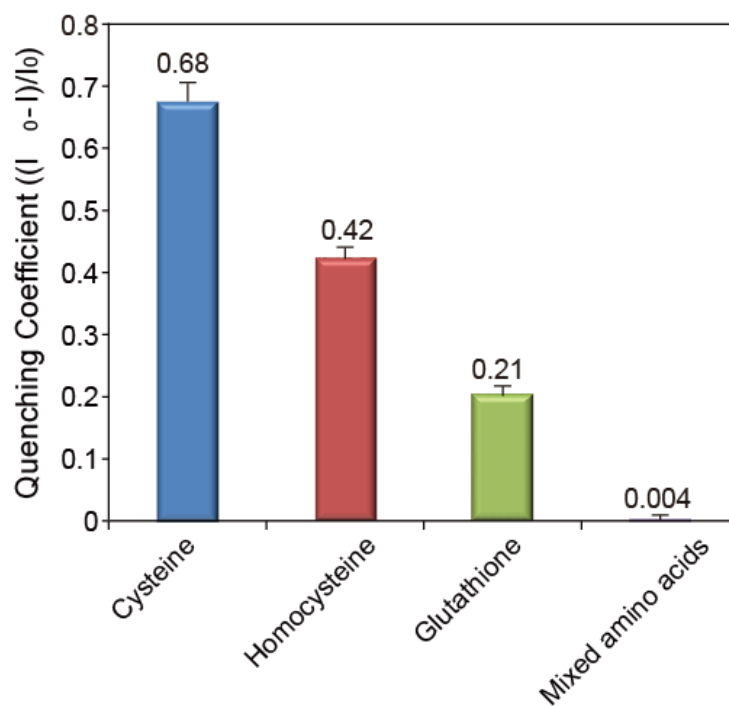

**Fig. S3** The quenching coefficient of CL intensity by adding different compounds: 1.0  $\mu$ M cysteine, homocysteine, and glutathione; and mixed amino acids containing alanine, cystine, valine, histidine, asparagines, serine, aspartic acid, tryptophan, isoleucine, lysine, proline, methionine, tyrosine, arginine, threonine, leucine, phenylalanine, glutamic acid and glycine. Quenching coefficient =  $(I_0 - I)/I_0$ , where  $I_0$  was the CL intensity in the absence of aminothiols and  $I$  was the CL intensity in the presence of aminothiols.

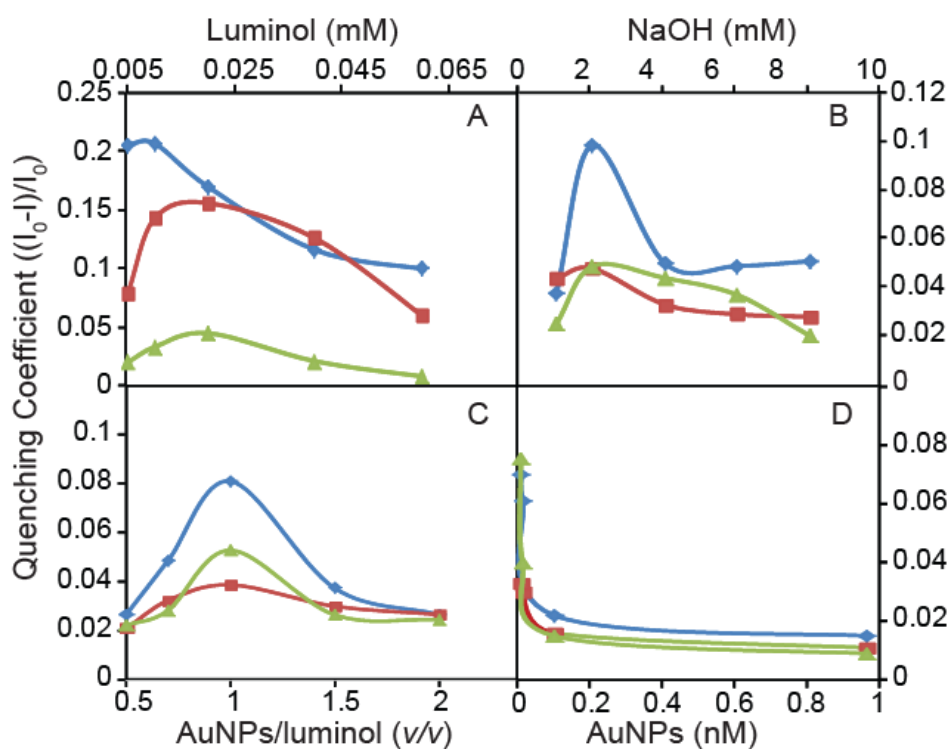

**Fig. S4** Effects of the reaction conditions on the quenching coefficient of cysteine ( $\blacklozenge$ ), homocysteine ( $\blacksquare$ ) and glutathione ( $\blacktriangle$ ) in the presence of the networked AuNPs: (A) concentration of luminol; (B) concentration of NaOH; (C) the volume ratio of the as-prepared spherical AuNPs to luminol; (D) concentration of the as-prepared spherical AuNPs. The injection volume of the as-prepared spherical AuNP solution or basic luminol solution was 100  $\mu$ L.
